# Supplementary material
Source: Springer Nature journal article supplement (https://www.springerprofessional.de/resource/supplementary/13638_2013_760_MOESM3_ESM.pdf/11898408)

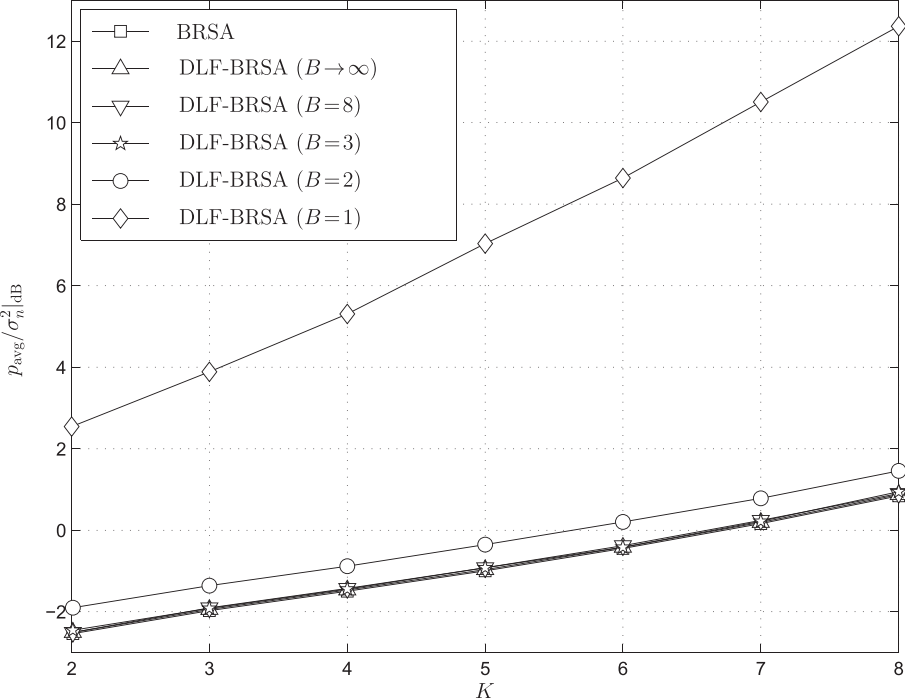

Supplement: MOESM3 [file 11898408]
